# Supplementary material for: 3D Visualization of Developmental Toxicity of 2,4,6-Trinitrotoluene in Zebrafish Embryogenesis Using Light-Sheet Microscopy
Source: MDPI journal article supplement (doi:10.3390/ijms17111925), 2016-11-17
Supplement: s1 [file s1]

# Supplementary Material: 3D Visualization of Developmental Toxicity of 2,4,6-Trinitrotoluene in Zebrafish Embryogenesis Using Light-Sheet Microscopy

Juneyong Eum, Jina Kwak, Hee Joung Kim, Seoyoung Ki, Kooyeon Lee, Ahmed A. Raslan, Ok Kyu Park, Md Ashraf Uddin Chowdhury, Song Her, Yun Kee, Seung-Hae Kwon and Byung Joon Hwang

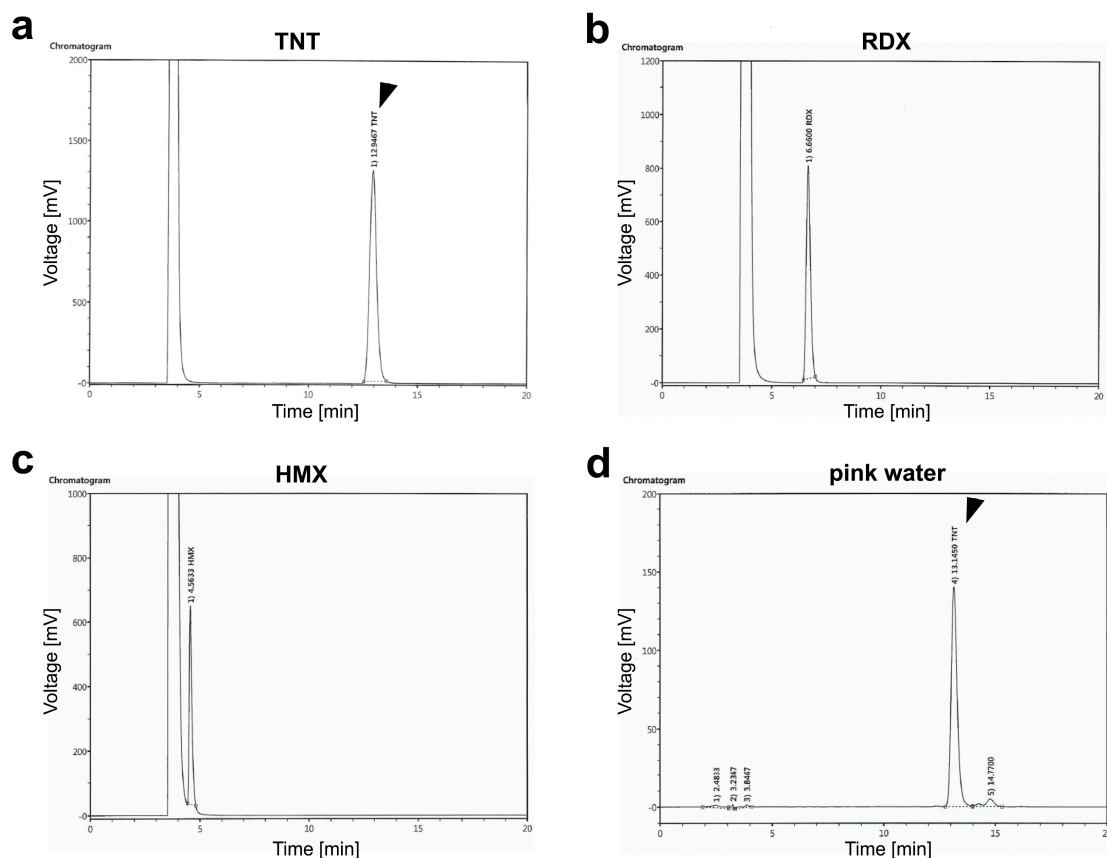

**Figure S1.** High performance liquid chromatography analysis of components in pink water. Retention times of trinitrotoluene (TNT) (a); cyclotrimethylenetrinitramine (RDX) (b); and cyclotetramethylenetetrinitramine (HMX) (c); which were dissolved in 1% acetone, were used as standards for the identification of pink water contaminants. The major peak in pink water was verified as TNT, as indicated by arrowheads (d).
